# Supplementary material for: Probing the Energetic Metabolism of Resting Cysts under Different Conditions from Molecular and Physiological Perspectives in the Harmful Algal Blooms-Forming Dinoflagellate Scrippsiella trochoidea
Source: MDPI journal article supplement (doi:10.3390/ijms22147325), 2021-07-07
Supplement: s1 [file s1]

**Supplementary materials 3. Probing the energetic metabolism of resting cysts under different conditions from molecular and physiological perspectives in the harmful algal blooms-forming dinoflagellate *Scrippsiella trochoidea***

**Table S3-1.** Information of nutrient concentrations  
(Guillard, 1975)

| <b>Component</b>                                    | <b>Molar Concentration in Final Medium</b> |
|-----------------------------------------------------|--------------------------------------------|
| NaNO <sub>3</sub>                                   | $8.82 \times 10^{-4}$ M                    |
| NaH <sub>2</sub> PO <sub>4</sub> ·H <sub>2</sub> O  | $3.62 \times 10^{-5}$ M                    |
| FeCl <sub>3</sub> ·6H <sub>2</sub> O                | $1.17 \times 10^{-5}$ M                    |
| Na <sub>2</sub> EDTA·2H <sub>2</sub> O              | $1.17 \times 10^{-5}$ M                    |
| CuSO <sub>4</sub> ·5H <sub>2</sub> O                | $3.93 \times 10^{-8}$ M                    |
| Na <sub>2</sub> MoO <sub>4</sub> ·2H <sub>2</sub> O | $2.60 \times 10^{-8}$ M                    |
| ZnSO <sub>4</sub> ·7H <sub>2</sub> O                | $7.65 \times 10^{-8}$ M                    |
| CoCl <sub>2</sub> ·6H <sub>2</sub> O                | $4.20 \times 10^{-8}$ M                    |
| MnCl <sub>2</sub> ·4H <sub>2</sub> O                | $9.10 \times 10^{-7}$ M                    |
| thiamine HCl (vit. B <sub>1</sub> )                 | $2.96 \times 10^{-7}$ M                    |
| biotin (vit. H)                                     | $2.05 \times 10^{-9}$ M                    |
| cyanocobalamin (vit. B <sub>12</sub> )              | $3.69 \times 10^{-10}$ M                   |

**Reference:**

Guillard, R. R. Culture of phytoplankton for feeding marine invertebrates. *Culture of marine invertebrate animals* **1975**, pp 29-60.
